# Supplementary material for: What are medical students learning about physical activity? Experiences from a South African medical education programme: A cross-sectional study
Source: Research Square preprint supplement (doi:10.21203/rs.3.rs-8379415/v1), 2026-01-06
Supplement: Supplementary file 1 [file 713748cd8e8aa11d7a254642.docx]

**Supplemental Table 2. Medical student response rate across year in medical school.**

| **Year of Programme** | **# of Enrolled Students** | **# of Respondents** | **Response Rate (%)** |
| --- | --- | --- | --- |
| GEMP 1 | 450 | 274 | 60.9% |
| GEMP 2 | 420 | 80 | 19.0% |
| GEMP 3 | 372 | 91 | 24.5% |
| GEMP 4 | 320 | 91 | 28.4% |

GEMP: General Education Medical Programme
