# Supplementary material for: What are medical students learning about physical activity? Experiences from a South African medical education programme: A cross-sectional study
Source: Research Square preprint supplement (doi:10.21203/rs.3.rs-8379415/v1), 2026-01-06
Supplement: Supplementary file 1 [file 788091188bc430c456bfb9c0.pdf]

**CONSENT:**

I confirm that the procedures of this study have been thoroughly explained to me. I acknowledge that the information collected will remain strictly confidential and may be used for research purposes, but no reference to my name will be revealed in any publication or statistical analysis.

DATE:

NAME:

SIGNATURE :

Please read the attached information sheet and sign the consent form before you fill out the questionnaire. By answering the questionnaire, you consent to participate in the study. Please answer all of the following questions. You may choose more than one response where applicable. Mark your response with a X in the appropriate box(es).

**Date:****Demographic information:**1. **Study number:** \_\_\_\_\_ **Student number:** \_\_\_\_\_2. **Gender:** ☐ Male ☐ Female3. **Age:** \_\_\_\_\_4. **GEMP year of study:**

Year 1

☐

Year 2

☐

Year 3

☐

Year 4

☐5. **Ethnicity:**Caucasian ☐African ☐Indian ☐Coloured ☐

Other: \_\_\_\_\_

6. **Country of origin:**

South Africa: \_\_\_\_\_

Other:..... (state)

## **PHYSICAL ACTIVITY**

### **Physical Activity Knowledge**

**For the following questions, physical activity refers to any activity that one does from low intensity (walking) to vigorous intensity (playing competitive sports).**

7. How many minutes of moderate intensity aerobic activity should an adult do per week to gain health benefits?  
\_\_\_\_\_ minutes/week
8. How many minutes of vigorous intensity aerobic activity should an adult do per week to gain health benefits?  
\_\_\_\_\_ minutes/week
9. How many days per week should strength/resistance exercise be performed? (e.g., using weights or doing squats).  
\_\_\_\_\_ days/week
10. What would you include in the prescription of physical activity for a patient?

---

---

---

### **Attitudes Towards Physical Activity**

**Please mark with an "X" the response that most closely fits your feelings towards the statement given. Responses are on a scale from Strongly agree to Strongly disagree.**

11. Physical activity is an important treatment and prevention tool for disease.

|                          |                          |                          |                          |                          |
|--------------------------|--------------------------|--------------------------|--------------------------|--------------------------|
| <input type="checkbox"/> |
| Strongly agree           | Agree                    | Neutral                  | Disagree                 | Strongly disagree        |

12. Promoting physical activity is an important part of my current/future patient consults.

|                          |                          |                          |                          |                          |
|--------------------------|--------------------------|--------------------------|--------------------------|--------------------------|
| <input type="checkbox"/> |
| Strongly agree           | Agree                    | Neutral                  | Disagree                 | Strongly disagree        |

13. I have sufficient knowledge to properly advise people about physical activity.

|                          |                          |                          |                          |                          |
|--------------------------|--------------------------|--------------------------|--------------------------|--------------------------|
| <input type="checkbox"/> |
| Strongly agree           | Agree                    | Neutral                  | Disagree                 | Strongly disagree        |

14. I believe that I can effectively help my patients increase their physical activity levels.

|                          |                          |                          |                          |                          |
|--------------------------|--------------------------|--------------------------|--------------------------|--------------------------|
| <input type="checkbox"/> |
| Strongly agree           | Agree                    | Neutral                  | Disagree                 | Strongly disagree        |

15. I would like more training in physical activity

|                          |                          |                          |                          |                          |
|--------------------------|--------------------------|--------------------------|--------------------------|--------------------------|
| <input type="checkbox"/> |
| Strongly agree           | Agree                    | Neutral                  | Disagree                 | Strongly disagree        |

### **Your Personal Physical Activity Practices**

16. How many minutes of moderate intensity aerobic activity do you do per week?

\_\_\_\_\_ minutes/week

17. How many minutes of vigorous intensity aerobic activity do you do per week?

\_\_\_\_\_ minutes/week

18. How many days per week do you perform strength/resistance exercise? (e.g., using weights or doing squats).

\_\_\_\_\_ days/week

19. This question is in regards to the time you spend sitting during the last 7 weekdays.

Include time spent at work, at home, while doing course work and during leisure time. This may include time spent sitting at a desk, visiting friends, reading, or sitting or lying down to watch television.

20. During the last 7 days, how much time did you spend sitting on a weekday?

\_\_\_\_\_ hours per day

\_\_\_\_\_ minutes per day

\_\_\_\_\_ Not sure

21. On a scale of 1 -10, during the next 6 months, I'm extremely confident I can change my exercise habits.

|                         |   |   |   |   |         |   |   |   |   |                   |
|-------------------------|---|---|---|---|---------|---|---|---|---|-------------------|
| Not at all<br>Confident |   |   |   |   | Neutral |   |   |   |   | Very<br>Confident |
| 0                       | 1 | 2 | 3 | 4 | 5       | 6 | 7 | 8 | 9 | 10                |

☐ I do not wish to change my exercise habits

### **Physical Activity Education in Medical School**

22. My medical school encourages students to exercise.

|                          |                          |                          |                          |                          |
|--------------------------|--------------------------|--------------------------|--------------------------|--------------------------|
| <input type="checkbox"/> |
| Strongly agree           | Agree                    | Neutral                  | Disagree                 | Strongly disagree        |

23. My classmates encourage each other to exercise.

|                          |                          |                          |                          |                          |
|--------------------------|--------------------------|--------------------------|--------------------------|--------------------------|
| <input type="checkbox"/> |
| Strongly agree           | Agree                    | Neutral                  | Disagree                 | Strongly disagree        |

24. I will be able to provide more credible and effective counselling, if I exercise and stay fit.

|                          |                          |                          |                          |                          |
|--------------------------|--------------------------|--------------------------|--------------------------|--------------------------|
| <input type="checkbox"/> |
| Strongly agree           | Agree                    | Neutral                  | Disagree                 | Strongly disagree        |

25. Prevention is less interesting to me than treatment.

|                          |                          |                          |                          |                          |
|--------------------------|--------------------------|--------------------------|--------------------------|--------------------------|
| <input type="checkbox"/> |
| Strongly agree           | Agree                    | Neutral                  | Disagree                 | Strongly disagree        |
